# Supplementary material
Source: PubMed Central journal article supplement (PMC3691916)
Supplement: Supp_Fig1.pdf [file Supp_Fig1.pdf]

**A** Mitotracker Deep Red Flow Cytometry

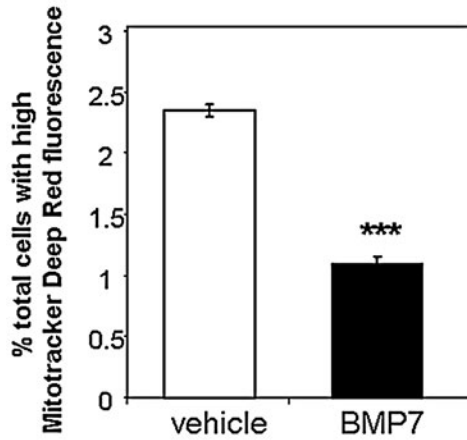

**B** BAT-marker Gene Expression

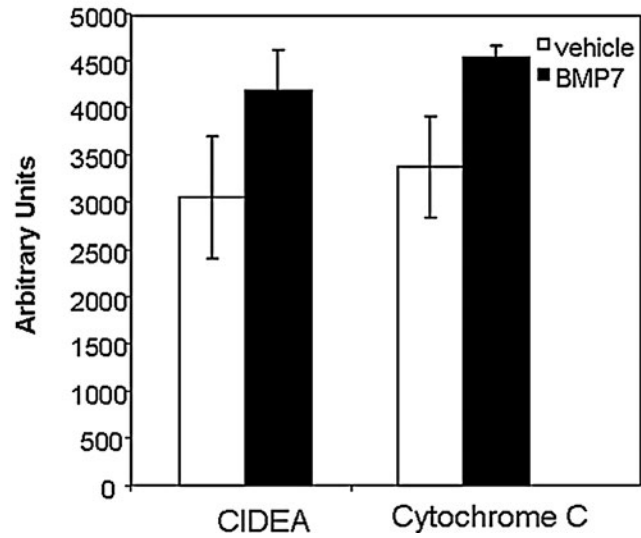

**SUPPLEMENTARY FIG. S1. BMP7 decreased membrane potential without altering expression of BAT genes. (A)** Decreased mitochondrial membrane potential in bone morphogenetic protein 7 (BMP7)-treated cells, as indicated by fewer cells with high Mitotracker Deep Red staining in flow cytometric analysis. **(B)** Gene expression of additional brown adipocyte markers at 48h of treatment, showing no significant differences in CIDEA or cytochrome C with BMP7 treatment. BAT, brown adipose tissue. \*\*\* $p < 0.001$ .
