# Supplementary material
Source: PubMed Central journal article supplement (PMC3691916)
Supplement: Supp_Fig2.pdf [file Supp_Fig2.pdf]

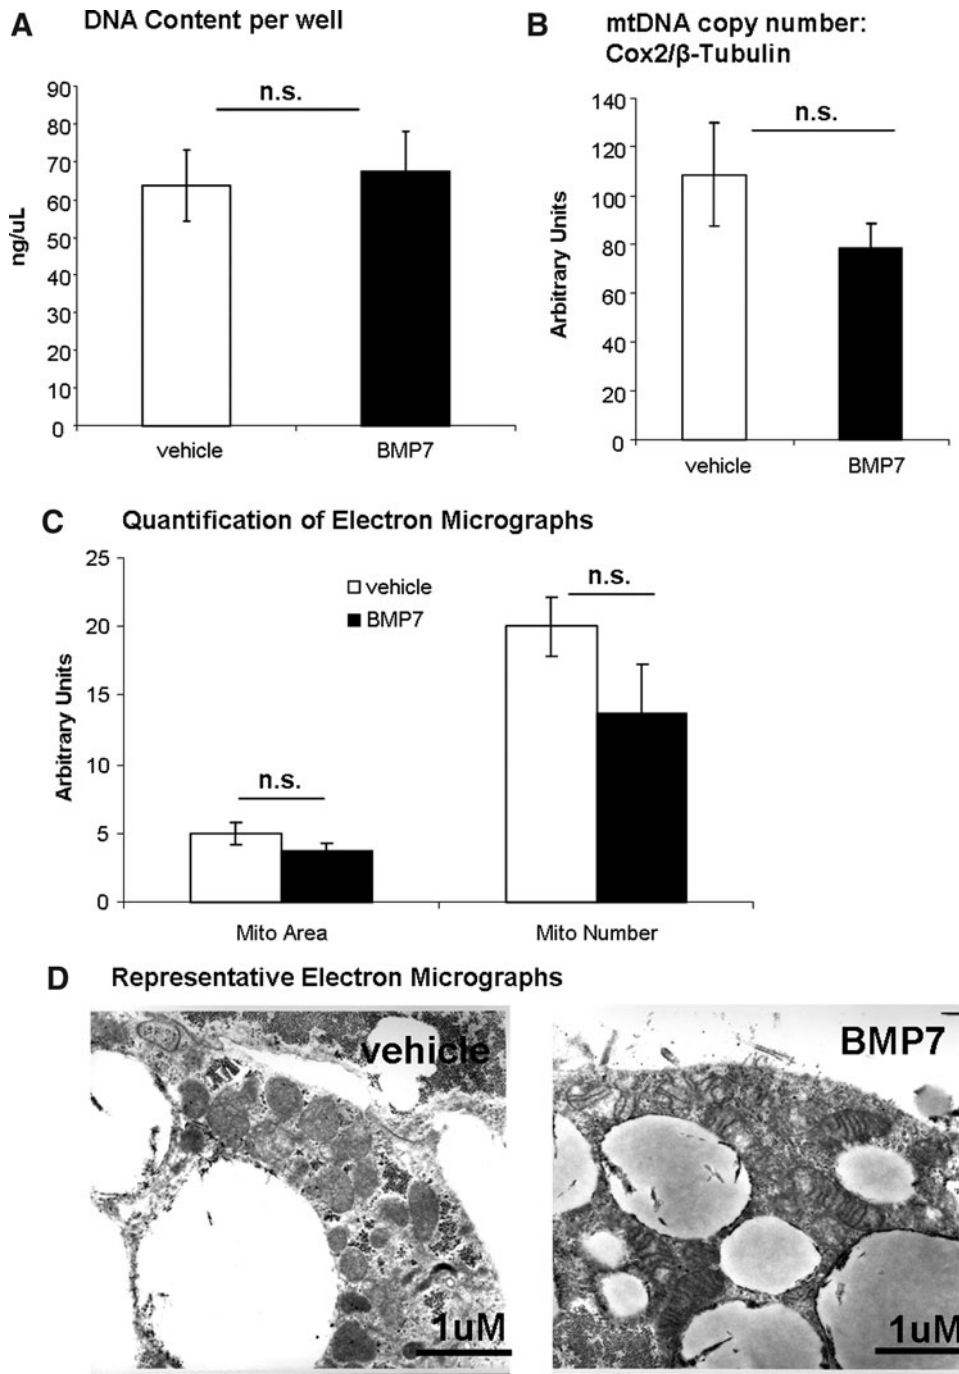

**SUPPLEMENTARY FIG. S2. BMP7 treatment did not affect nuclear or mitochondrial DNA content, or amount of mitochondria.** (A) After 48 h treatment with vehicle or BMP7, there was no difference in total DNA content, indicating that there were no changes in the cell number ( $n=5$  wells per group from experiments in Fig. 4). (B) BMP7 treatment did not change mitochondrial DNA copy number at 48 h, indicated by the ratio of *cox2* (mtDNA) over  $\beta$ -tubulin (nuclear DNA). (C) BMP7 treatment did not significantly change the mitochondrial area or mitochondrial number, as quantified from electron micrographs (EM) using ImageJ.  $n=14$  images for BMP7 and  $n=15$  images for vehicle were quantified. (D) Representative EM images of vehicle- (left) and BMP7-treated cells (right). Scale bars represent  $1 \mu\text{M}$ . n.s., not significant.
