# Supplementary material
Source: PubMed Central journal article supplement (PMC3691916)
Supplement: Supp_Fig3.pdf [file Supp_Fig3.pdf]

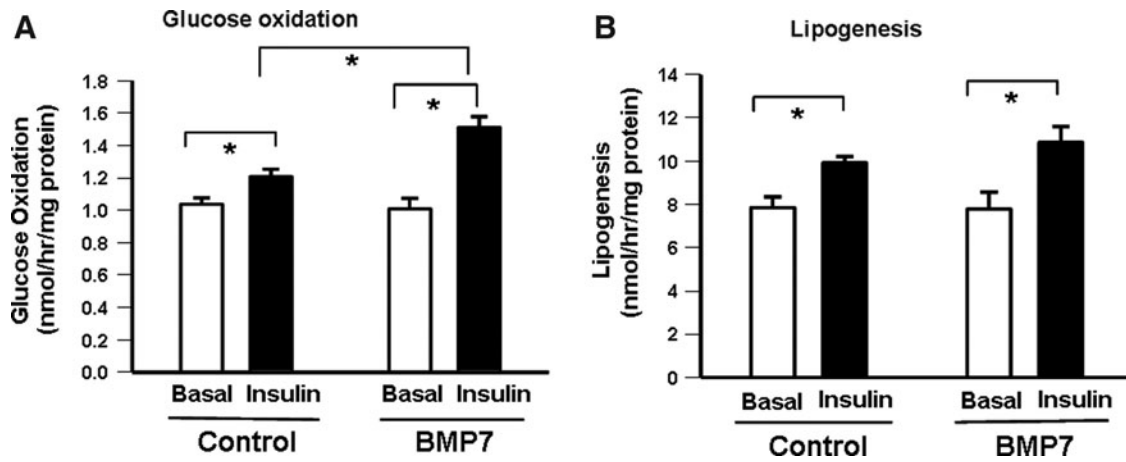

**SUPPLEMENTARY FIG. S3.** BMP7 did not affect basal glucose oxidation or lipogenesis. (A) BMP7 increased glucose oxidation only in the insulin-stimulated condition. (B) There were no differences in lipogenesis between BMP7- and control-treated cells. \* $p < 0.05$ .
