# Supplementary material
Source: PubMed Central journal article supplement (PMC3691916)
Supplement: Supp_Fig4.pdf [file Supp_Fig4.pdf]

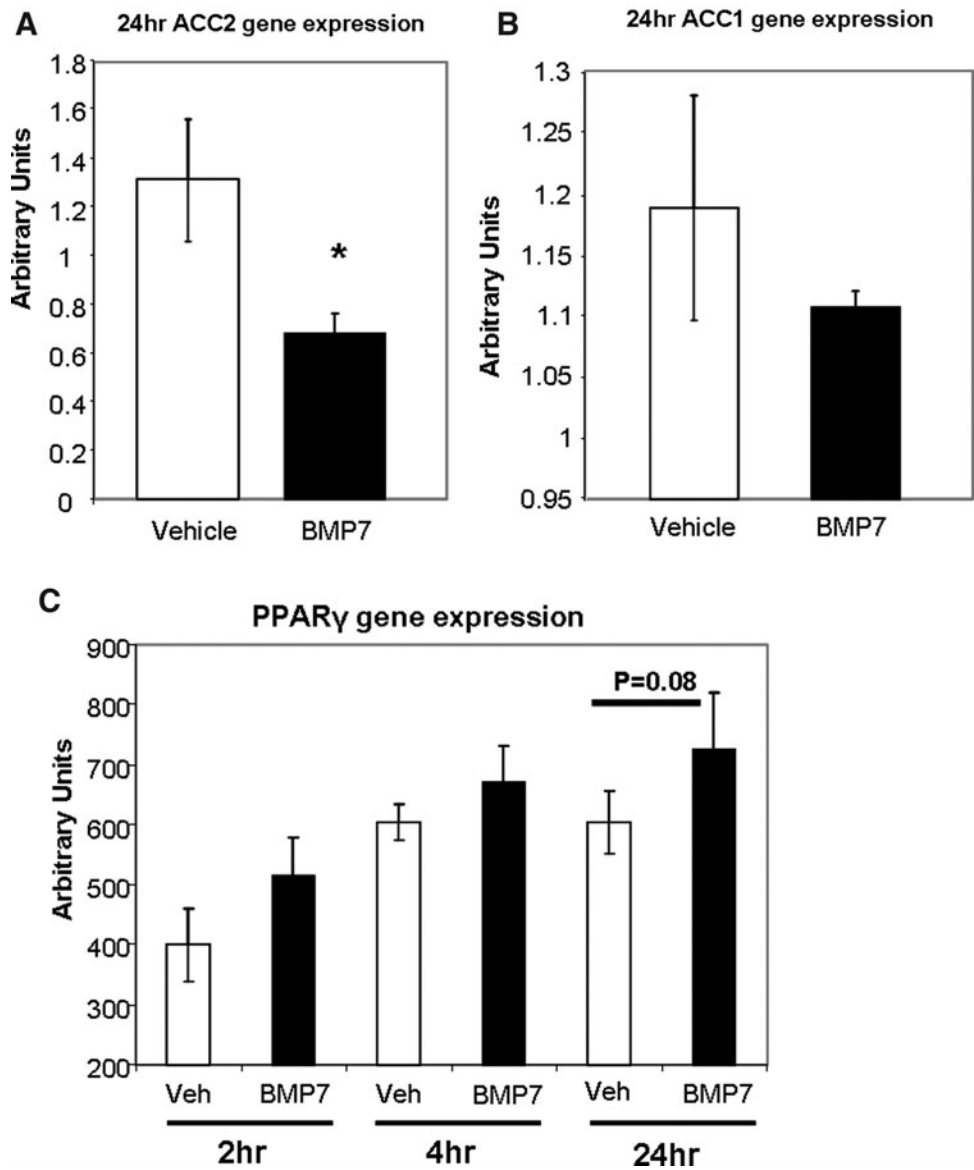

SUPPLEMENTARY FIG. S4. BMP7 decreased gene expression of ACC2 and displayed a consistent trend for increased gene expression of peroxisome proliferator-activated receptor gamma (PPAR $\gamma$ ). (A) ACC2 gene expression was significantly reduced at 24 h of BMP7 treatment. (B) ACC1 gene expression was not significantly changed at 24 h of BMP7 treatment. (C) PPAR $\gamma$  showed a trend to be increased at 2, 4, and 24 h.
