# Supplementary material
Source: PubMed Central journal article supplement (PMC3691916)
Supplement: Supp_Fig5.pdf [file Supp_Fig5.pdf]

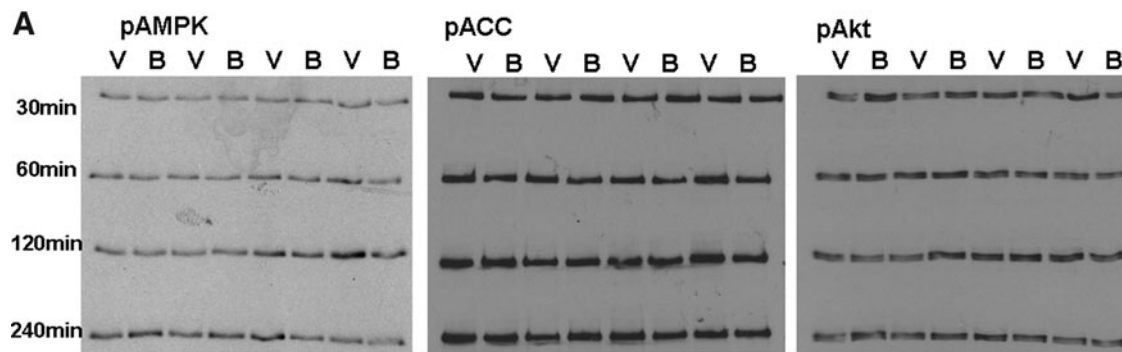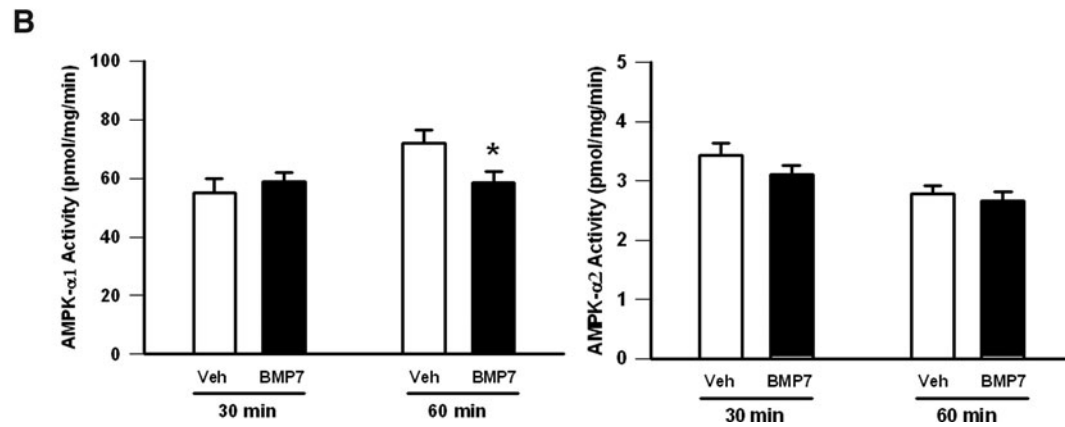

**SUPPLEMENTARY FIG. S5. BMP7 did not affect AMPK protein or activity levels. (A)** BMP7 did not affect protein levels of pAMPK, pACC, or pAkt. **(B)** BMP7 did not increase AMPK subunit activity ( $\alpha$ 1 activity in *left panel*;  $\alpha$ 2 activity in *right panel*).
